# Supplementary material for: Bridge-DNA synthesis triggered by an allosteric aptamer for the colorimetric detection of pathogenic bacteria
Source: Royal Society of Chemistry journal article supplement (doi:10.1039/d2ay01844f), 2022-12-14
Supplement: d2ay01844f1.pdf [file d2ay01844f1.pdf]

**Supporting Material for**

**Bridge-DNA synthesis triggered by allosteric aptamer for colorimetric detection  
of pathogenic bacteria**

Jingtong Wang<sup>†,1</sup>, Yongqiang Cao<sup>†,1</sup>, Zhao Li<sup>1</sup>, Meiling Dong<sup>1</sup>, Wei Dou<sup>1</sup>,  
Xiaoping Xu<sup>2</sup>, Shengbin He<sup>\*,1</sup>

<sup>1</sup> Key Laboratory of Longevity and Aging-related Diseases of Chinese Ministry of Education, Guangxi Colleges and Universities Key Laboratory of Biological Molecular Medicine Research, School of Basic Medical Sciences, Guangxi Medical University, Nanning, Guangxi 530021, P. R. China.

<sup>2</sup> College of Chemistry, Fuzhou University, Fuzhou, Fujian, 350108, P. R. China.

<sup>†</sup>These authors contributed equally to this work.

\*To whom correspondence should be addressed. E-mail: [comhsb@163.com](mailto:comhsb@163.com)

(Shengbin He);

This Supporting Information includes Supplementary table S1, table S2, table S3  
Figure S1, Figure S2, Figure S3, Protocol S1, and Protocol S2.

**Table S1.** Single-stranded DNA sequences used in this study

| Name | Nucleic acid sequence, listed from 5' to 3'                          |
|------|----------------------------------------------------------------------|
| AAP1 | Cy3-AACCATACCTGACGACGGATAACGAGGTATTCACGACTGGTCGTCAGGTATGGTT-Cy5      |
| AAP2 | Cy3-AACCATACCTGACGACCCGGATAACGAGGTATTCACGACTGGTCGTCAGGTATGGTT-Cy5    |
| AAP3 | Cy3-ATACCTGACGACCAGTCGCGGATAACGAGGTATTCACGACTGGTCGTCAGGTATGGTT-Cy5   |
| AAP4 | Cy3-CCTGACGACCAGTCGTGAATCGGATAACGAGGTATTCACGACTGGTCGTCAGGTATGGTT-Cy5 |
| AAP5 | Cy3-CGGATAACGAGGTATTCACGACTGGTCGTCAGGTATGGTTATACCTCGTTATCCG-Cy5      |
| AAP6 | Cy3-CGGATAACGAGGTATTCACGACTGGTCGTCAGGTATGGTTCTGAATACCTCGTTAT-Cy5     |
| AAP5 | biotin-CGGATAACGAGGTATTCACGACTGGTCGTCAGGTATGGTTATACCTCGTTATCCG       |

Note: Green and yellow letters represent complementary part and recognition part of the AAP, respectively. Shaded letters represent complementary site of the recognition part against to complementary part.

**Supplementary table S2.** Paired Primer sequences used in this study

| Name | Nucleic acid sequence, listed from 5' to 3' |
|------|---------------------------------------------|
| PP6  | Biotin-CGGATA                               |
| PP8  | Biotin-CGGATAAC                             |
| PP10 | Biotin-CGGATAACGA                           |
| PP12 | Biotin-CGGATAACGAGG                         |
| PP14 | Biotin-CGGATAACGAGGTA                       |

**Supplementary table S3.** Comparison of different culture-independent methods for detection of pathogenic bacteria.

| <b>Methods</b>         | Testing time | Detection limits                          | Necessary instrumentation and cost  | References |
|------------------------|--------------|-------------------------------------------|-------------------------------------|------------|
| <b>Parameters</b>      |              |                                           |                                     |            |
| AuNP-BDS               | 30-60 min    | 10 <sup>1</sup> -10 <sup>2</sup> cells/mL | UV Spectrophotometer (very cheap)   | -          |
| ELISA                  | 90-150 min   | 10 <sup>4</sup> -10 <sup>5</sup> cells/mL | UV Spectrophotometer (very cheap)   | 1, 2       |
| Electrochemical sensor | 120-180 min  | 10 <sup>1</sup> -10 <sup>2</sup> cells/mL | Electrochemical workstation (cheap) | 3, 4       |
| Flow Cytometry         | 10-120 min   | 10 <sup>3</sup> -10 <sup>5</sup> cells/mL | Flow Cytometer (very expensive)     | 5-7        |
| qPCR                   | 60-120 min   | 1-10 cells/mL                             | qPCR instrument (expensive)         | 8          |
| SERS                   | 20-60 min    | 10 <sup>1</sup> -10 <sup>2</sup> cells/mL | Raman spectroscopy (expensive)      | 9, 10      |

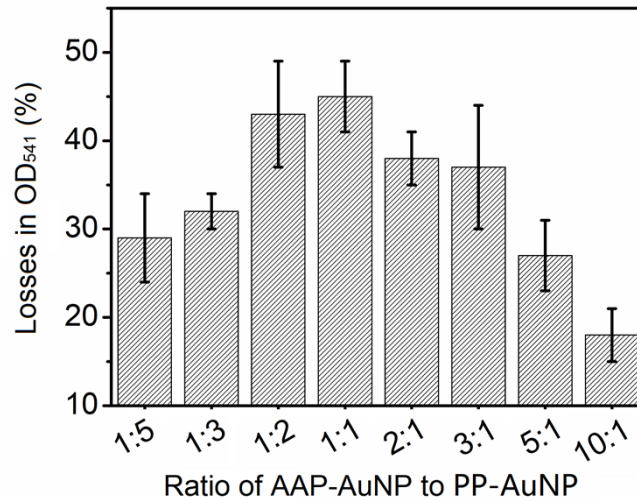

**Supplementary Fig. S1.** 1. The effect of AAP-AuNP/PP-AuNP ratio on the signal-to-background ratio (S/N) of the AuNP-BDS for detecting 100 cfu/mL *E. coli* O157:H7. The S/N was defined as the loss of OD<sub>541</sub> value of AuNP-BDS in respond to *E. coli* O157:H7.

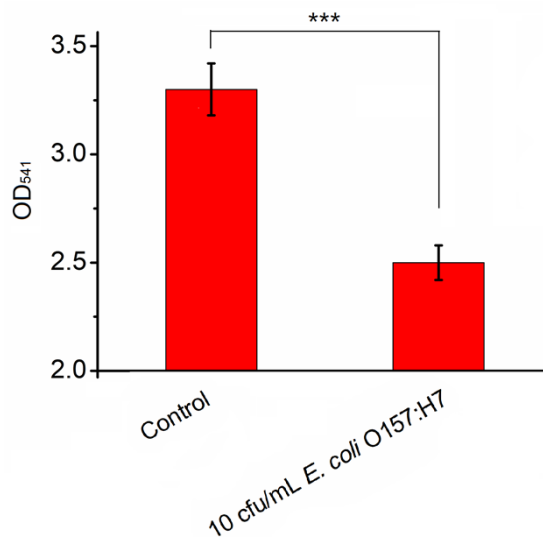

**Supplementary Fig. S2.** Responses of OD<sub>541</sub> value to 10 cfu/mL *E. coli* O157:H7 after bridge DNA synthesis for 35 min. Ten independent experiments were carried out for each group. The three asterisks represented P value was less than 0.01.

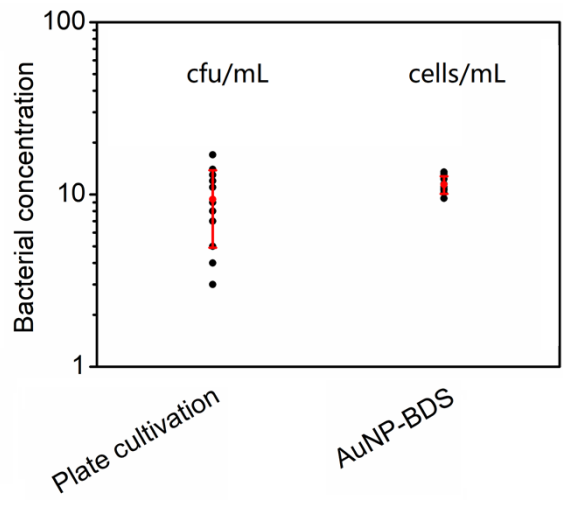

**Supplementary Fig. S3.** Repeatability of the AuNP-BDS assay against to plate cultivation for detecting *E. coli* O157:H7 at a concentration of about 10 cfu/mL. Eleven repeats were carried out for each methods.

### **Protocol S1. Sample pretreatment for milk**

Milk was diluted 100 times with pure water, and vortexed for 1 min. Then 10 mL dilution was pipetted into a tube, and centrifuged at 12000 rpm for 5 min to separate cream from bacteria and protein particles. The cream on the top and in the supernatant were removed, and the pellet along with 1 mL supernatant were left in the tube. After cleaning the cream adsorbed on the tube wall by a Q-tip cotton swab, 8.95 mL water and 50  $\mu$ L proteinase K (Solarbio Life Sciences, Beijing, China, 20 mg/mL) were added and the tube was vortexed to mix well. The tube was incubated at 37 °C for 40 min to digest protein particles, and then re-centrifuged to remove cream again as mentioned above. The pellet was mixed with residual 1 mL supernatant in the tube to obtain 1 mL purified bacterial suspension.

### **Protocol S2. Sample pretreatment for orange juice**

The juice sample was diluted 10 times with ultrapure water, and filtered through a PP membrane (5  $\mu$ m pore size). Then 10 mL filtered solution was pipetted into a tube, and centrifuged at 5000 g for 5 min. Nine hundred microliter supernatant was removed carefully, and the pellet along with 1 mL residual supernatant were left undisturbed in the tube. After that, 9 mL cellulase solution (50 mg/mL) was added to the tube to lyse plant cells and debris for 60 min at 37 °C. The digested sample was centrifuged at 5000 g for 5 min. Nine milliliter supernatant was removed carefully, and the pellet along with 1 mL residual supernatant were left undisturbed in the tube. After that, 9 mL ultrapure water was added to the tube and mixed well. The sample was again centrifuged at 5000 g for 5 min. Nine milliliter supernatant was removed carefully, and the pellet was resuspended with the residual supernatant (1 mL).

## References:

1. S. Ashis, H. Tom, C. Jan, *Biomed. Microdevices*, 2011, **13**:705-715.
2. H. Ikuta, N. Noda, Y. Ebie, A. Hirata, S. Tsuneda, M. Matsumura, Y. Inamori, *Water Sci. Technol.*, 2000, **42 (3-4)**: 1–7.
3. X. Dong, Z. Shi, C. Xu, C. Yang, F. Chen, M. Lei, J. Wang, Q. Cui, *Biosens. Bioelectron.*, 2020, **149**:111843.
4. F. Luo, Z. Li, G. Dai, Y. Lu, P. He, Q. Wang, *Sensor. Actuat. B-Chem.*, 2020, **306**:127577.
5. S. He, X. Hong, T. Huang, W. Zhang, Y. Zhou, L. Wu and X. Yan, *Methods Appl. Fluoresc.*, 2017, **5**:024002.
6. S. He, X. Hong, M. Zhang, L. Wu and X. Yan, *Anal. Chem.*, 2020, **92**: 2393-2400.
7. J. Sun, Y. Mao, L. Cui, Y. Cao, Z. Li, M. Ling, X. Xu and S. He, *Methods Appl. Fluoresc.*, 2021, **9**: 035001.
8. D. Rajiv, M. Azlin, *Food Control*, 2023, **125**:109456.
9. Y. Li, F. Gao, C. Lu, M. L. Fauconnier and J. Zheng, *Biosensors-Basel*, 2021, **11**:354.
10. S. Asgari, R. Dhital, S. A. Aghvami, A. Mustapha, Y. Zhang and M. Lin, *Microchim. Acta*, 2022, 189:111.
